# Supplementary material
Source: PubMed Central journal article supplement (PMC5405247)
Supplement: JCM.02319-16_zjm999095474s1.pdf [file JCM.02319-16_zjm999095474s1.pdf]

| Drugs defined as laxatives                            | Route of administration |
|-------------------------------------------------------|-------------------------|
| acacia-inulin-cellulose-chrom poly-green tea          | oral                    |
| acacia                                                | oral                    |
| acacia-inulin-cellulose-multivit,min-FA oral          | oral                    |
| bisacodyl                                             | enema, oral, rectal     |
| bisacodyl-polyethylene glycol electrolyte solution    | oral                    |
| bisacodyl-magnesium citrate                           | oral, rectal            |
| bisacodyl-sodium biphosphate-sodium phosphate         | oral                    |
| bisacodyl-magnesium citrate-phenolphthalein           | oral                    |
| bran                                                  | oral                    |
| guar gum-calcium                                      | oral                    |
| calcium carb-ipecac-cham flw                          | oral                    |
| calcium polycarophil                                  | oral                    |
| casanth-docusate na-me-cell                           | oral                    |
| casanthranol-docusate sodium                          | oral                    |
| casanthranol-docusate potassium                       | oral                    |
| casacara sagrada                                      | oral                    |
| casacara sagrada                                      | oral                    |
| casacara sagrada-magnesium hydroxide                  | oral                    |
| casacasagrada-phenolphthalein                         | oral                    |
| casacara-bisacodyl-bile salt-aloe                     | oral                    |
| bile salts-caps-casc-phenolphthalein                  | oral                    |
| castor oil                                            | oral                    |
| cellulose                                             | oral                    |
| danthron-docusate calcium                             | oral                    |
| danthron-docusate sodium                              | oral                    |
| dextrin                                               | oral                    |
| dehydrocholic acid-DSS                                | oral                    |
| fiber-maltodextrin-inulin-FOS                         | oral                    |
| FOS-malto-polydextrose-sorb 70                        | oral                    |
| fructooligosaccharide/maltodex/polydex/sorb70         | oral                    |
| fructooligosaccharides-polydextrose                   | oral                    |
| maltodextrin-fructooligosaccharides                   | oral                    |
| FOS-maltodextrin-polydextrose                         | oral                    |
| fructooligosaccharides-polydextrose                   | oral                    |
| glycerin                                              | rectal                  |
| inulin                                                | oral                    |
| inulin-chromium-green tea-sorbitol                    | oral                    |
| inulin-chromium piccolinate                           | oral                    |
| inulin-sorbitol                                       | oral                    |
| inulin-vit D3-calcium-sorbitol                        | oral                    |
| karaya gum                                            | oral                    |
| lactulose                                             | oral                    |
| lubiprostone                                          | oral                    |
| magnesium citrate                                     | oral                    |
| magnesium hydroxide                                   | oral                    |
| magnesium sulfate                                     | oral                    |
| magnesium-tartaric acid-rhubarb                       | oral                    |
| malt extract                                          | oral                    |
| dextrin oral                                          | oral                    |
| maltodextrin oral                                     | oral                    |
| maltodextrin-aspartame                                | oral                    |
| maltodextrin-guar gum                                 | oral                    |
| methylcellulose                                       | oral                    |
| mineral oil                                           | oral, rectal            |
| mineral oil-chondrus                                  | oral                    |
| mineral oil-docusate sodium                           | oral                    |
| magnesium hydroxide in mineral oil                    | oral                    |
| sodium phosphate mono & dibasic-cellulose             | oral                    |
| sodium phosphates                                     | oral, rectal            |
| sodium phosphates-pramox-gly                          | oral                    |
| sod phos mono-sod phos dibasic                        | oral                    |
| pepsin-rhubarb                                        | oral                    |
| phenolphthalein                                       | oral                    |
| phenolphthalein, yellow                               | oral                    |
| phenolphthalein-docusate Na                           | oral                    |
| phenolphthalein-docusate Ca                           | oral                    |
| dehydrocholic acid-phiphth-DSS                        | oral                    |
| phenolphthalein in mineral oil                        | oral                    |
| polydextrose-xylitol                                  | oral                    |
| polyethylene glycol 3350                              | oral                    |
| polyethylene glycol 3350-electrolytes                 | oral                    |
| polyethylene glycol 3350-electrolytes-vit C           | oral                    |
| pot-picric ac-herb-yellow jas                         | oral                    |
| potassium bitartrate-sodium bicarbonate               | rectal                  |
| psyllium husk                                         | oral                    |
| psyllium husk-calcium                                 | oral                    |
| psyllium husk-inulin-aspartame                        | oral                    |
| psyllium husk-laxative combination no.1               | oral                    |
| psyllium husk-laxative no. 1                          | oral                    |
| psyllium                                              | oral                    |
| psyllium seed                                         | oral                    |
| psyllium husk                                         | oral                    |
| psyllium-bran                                         | oral                    |
| psyllium seed-saccharin                               | oral                    |
| psyllium effervescent                                 | oral                    |
| senna                                                 | oral                    |
| senna-bisacodyl-docusate                              | oral                    |
| senna-bisacodyl-magnesium                             | oral                    |
| senna-docusate sodium                                 | oral                    |
| sennosides-docusate sodium                            | oral                    |
| senna-fennel                                          | oral                    |
| senna-herbal drugs                                    | oral                    |
| senna leaf-psyllium-cascara-l.acidophilus-herbal #195 | oral                    |
| senna-psyllium-cascara-l.acidophilus-herbal #195      | oral                    |
| senna leaf-psyllium-cascara-l.acidophilus-herbal #235 | oral                    |
| senna-psyllium                                        | oral                    |
| sennosides                                            | oral                    |
| sennosides-docusate sodium                            | oral                    |
| sennosides-prunes                                     | oral                    |
| sennosides-psyllium husk                              | oral                    |
| soap enema                                            | rectal                  |
| sodium picosulfate-magnesium oxide-citric acid        | oral                    |
| sodium,potassium,&mag sulfates                        | oral                    |
| wheat bran                                            | oral                    |
| wheat dextrin                                         | oral                    |
| wheat dex-L. acid-aspartame                           | oral                    |

**Supplementary Table 1. Drugs defined as laxatives in the *C. difficile* testing criteria report.**

| <b>Clinical Outcome</b>                              | <b>Canceled Orders<br/>(N=264)</b> | <b>Accepted Orders<br/><i>C. difficile</i>-Negative<br/>(N=787)</b> | <b>P value</b> |
|------------------------------------------------------|------------------------------------|---------------------------------------------------------------------|----------------|
| <b>Diarrhea in 7 days</b>                            | 58.3% (154/264)<br>52.4%-64.3%     | 73.2% (576/787)<br>70.1%-76.3%                                      | < 0.001        |
| <b>WBC rise to &gt;15,000<br/>cells/mL in 7 days</b> | 9.8% (15/153)<br>5.1%-14.5%        | 12.0% (61/507)<br>9.2%-14.9%                                        | 0.56           |
| <b>ICU admission in<br/>7 days</b>                   | 13.3% (35/264)<br>9.2%-17.4%       | 10.3% (81/787)<br>8.2%-12.4%                                        | 0.21           |
| <b>30-day all-cause<br/>mortality</b>                | 11.0% (25/228)<br>6.9%-15.0%       | 8.3% (59/708)<br>6.3%-10.4%                                         | 0.23           |

**Supplementary Table 2. Clinical outcomes in patients with cancelled *C. difficile* orders.**

Cancelled orders in patients without diarrhea or with laxative intake

Accepted orders in patients with diarrhea and no laxative intake

Excludes patients treated with any amount of metronidazole or oral vancomycin 24 hours before and after test cancelation or resulting, and patients who qualified for testing within 24 hours of cancelation

Cells show % (no./no.) 95% C

A

C.diff Testing Criteria Report

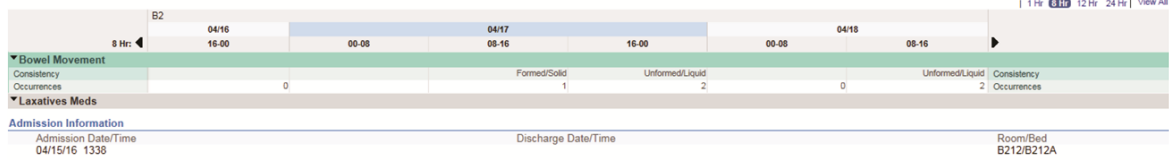

B

C.diff Testing Criteria Report

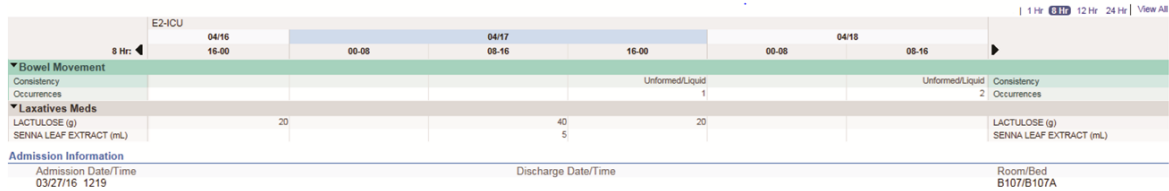

**Supplementary Figure 1. Illustration of *C. difficile* testing criteria report.** Provides real-time data on occurrence and consistency of bowel movements and laxative intake per unit of time. It also shows rectal tube placement as well as time of admission. (A) Example of a patient that meets the intervention testing criteria due to presence of diarrhea (i.e.,  $\geq 3$  unformed stool in 24 hours) and no laxative intake in the 48 hours prior. (B) Example of a patient that does not meet intervention testing criteria due to administration of laxative in the 48 hours prior. Both examples assume the specimen was collected on 04/18 at 16:00.
